# Supplementary material
Source: PubMed Central journal article supplement (PMC2670144)
Supplement: M807241200_1.pdf [file M807241200_1.pdf]

**Raw data effect of Compound 1 on the recruitment of white blood cells  
Peritoneal lavage (2\*5ml PBS/EDTA) 48h after the injection of Thioglycolate**

Data were averaged for the six animals in each group, and expressed as % inhibition as compared to recruitment seen by thioglycolate (Thioglycolate/Control) over background (Water/none).

| Irritant (thioglycolate/treatment) | Dose (mg/kg) | Route | Animal ID | Body weight g | Counts 10 <sup>3</sup> /μl | Neutrophils  |                            | Lymphocytes  |                            | Mono/macrophages |                            |  |
|------------------------------------|--------------|-------|-----------|---------------|----------------------------|--------------|----------------------------|--------------|----------------------------|------------------|----------------------------|--|
|                                    |              |       |           |               |                            | % inhibition | Counts 10 <sup>3</sup> /μl | % inhibition | Counts 10 <sup>3</sup> /μl | % inhibition     | Counts 10 <sup>3</sup> /μl |  |
| Water/none                         | 0            | po    | C1        | 24.4          | 0.05                       | 100.6        | 1.3                        | 102.0        | 1.4                        | 95.8             |                            |  |
|                                    |              |       | C2        | 29.2          | 0.07                       | 100.0        | 1.3                        | 101.4        | 1.1                        | 105.3            |                            |  |
|                                    |              |       | C3        | 24.7          | 0.08                       | 99.8         | 1.3                        | 101.9        | 1.4                        | 97.1             |                            |  |
|                                    |              |       | C4        | 24.3          | 0.08                       | 99.8         | 1.5                        | 98.8         | 1.4                        | 96.5             |                            |  |
|                                    |              |       | C5        | 25.7          | 0.07                       | 100.0        | 1.7                        | 96.2         | 1.2                        | 102.5            |                            |  |
|                                    |              |       | C6        | 25.6          | 0.08                       | 99.8         | 1.4                        | 99.8         | 1.2                        | 102.8            |                            |  |
| Thioglycolate/Dexamethasone        | 1            | po    | R1        | 26.1          | 1.14                       | 71.4         | 3.0                        | 79.8         | 2.1                        | 75.5             |                            |  |
|                                    |              |       | R2        | 23.5          | 0.84                       | 79.4         | 2.8                        | 82.7         | 1.8                        | 83.7             |                            |  |
|                                    |              |       | R3        | 22.7          | 1.05                       | 73.8         | 2.5                        | 86.4         | 2.3                        | 69.4             |                            |  |
|                                    |              |       | R4        | 23.5          | 0.99                       | 75.4         | 2.1                        | 92.0         | 2.1                        | 76.1             |                            |  |
|                                    |              |       | R5        | 23.1          | 1.24                       | 68.7         | 2.4                        | 88.2         | 2.2                        | 72.2             |                            |  |
|                                    |              |       | R6        | 22.7          | 1.19                       | 70.0         | 2.4                        | 87.3         | 2.1                        | 76.7             |                            |  |
| Thioglycolate/Control (vehicle)    | 1.5%         | po    | T1        | 25.7          | 3.22                       | 15.6         | 7.5                        | 24.8         | 4.5                        | 4.4              |                            |  |
|                                    |              |       | T2        | 26.9          | 4.40                       | -16.0        | 11.2                       | -21.9        | 5.9                        | -40.9            |                            |  |
|                                    |              |       | T3        | 24.5          | 3.93                       | -3.4         | 9.4                        | 1.1          | 4.3                        | 8.4              |                            |  |
|                                    |              |       | T4        | 22.7          | 4.13                       | -8.8         | 10.2                       | -9.9         | 4.5                        | 2.0              |                            |  |
|                                    |              |       | T5        | 27.9          | 2.88                       | 24.7         | 8.3                        | 13.9         | 3.7                        | 26.3             |                            |  |
|                                    |              |       | T6        | 26.5          | 4.26                       | -12.2        | 10.1                       | -8.0         | 4.6                        | -0.2             |                            |  |
| Thioglycolate/Compound 1           | 60           | po    | A1        | 26.6          | 2.26                       | 41.4         | 8.6                        | 10.4         | 3.2                        | 43.6             |                            |  |
|                                    |              |       | A2        | 25.7          | 2.32                       | 39.7         | 9.1                        | 4.2          | 4.4                        | 5.0              |                            |  |
|                                    |              |       | A3        | 23.5          | 2.22                       | 42.4         | 8.6                        | 10.8         | 3.9                        | 20.2             |                            |  |
|                                    |              |       | A4        | 25.8          | 2.30                       | 40.3         | 6.3                        | 38.8         | 2.8                        | 53.3             |                            |  |
|                                    |              |       | A5        | 25.0          | 2.35                       | 38.9         | 7.0                        | 30.2         | 3.6                        | 29.3             |                            |  |
|                                    |              |       | A6        | 22.8          | 1.81                       | 53.4         | 6.4                        | 37.8         | 3.1                        | 44.8             |                            |  |
| Thioglycolate/Compound 1           | 30           | po    | B1        | 26.7          | 2.22                       | 42.4         | 7.6                        | 22.4         | 4.1                        | 14.1             |                            |  |
|                                    |              |       | B2        | 25.0          | 1.68                       | 56.9         | 7.0                        | 30.7         | 3.4                        | 35.1             |                            |  |
|                                    |              |       | B3        | 24.5          | 3.10                       | 18.8         | 6.0                        | 43.0         | 4.0                        | 18.7             |                            |  |
|                                    |              |       | B4        | 23.4          | 2.97                       | 22.3         | 7.4                        | 25.2         | 4.7                        | -2.3             |                            |  |
|                                    |              |       | B5        | 28.3          | 2.59                       | 32.5         | 9.0                        | 4.9          | 3.6                        | 31.1             |                            |  |
|                                    |              |       | B6        | 26.8          | 2.61                       | 32.0         | 7.6                        | 23.4         | 3.0                        | 47.2             |                            |  |
| Thioglycolate/Compound 1           | 10           | po    | B1        | 25.4          | 3.13                       | 18.0         | 7.0                        | 30.9         | 3.5                        | 32.4             |                            |  |
|                                    |              |       | B2        | 24.8          | 3.16                       | 17.2         | 8.8                        | 8.2          | 4.5                        | 3.2              |                            |  |
|                                    |              |       | B3        | 24.1          | 2.00                       | 48.3         | 6.4                        | 37.6         | 2.9                        | 51.5             |                            |  |
|                                    |              |       | B4        | 25.4          | 2.26                       | 41.4         | 6.7                        | 33.9         | 3.5                        | 33.0             |                            |  |
|                                    |              |       | B5        | 23.3          | 2.45                       | 36.3         | 8.0                        | 18.4         | 5.0                        | -11.1            |                            |  |
|                                    |              |       | B6        | 21.5          | 3.51                       | 7.9          | 9.0                        | 5.6          | 3.9                        | 22.0             |                            |  |
| Thioglycolate/Compound 1           | 3            | po    | B1        | 22.3          | 2.46                       | 36.0         | 8.2                        | 14.9         | 4.6                        | 1.1              |                            |  |
|                                    |              |       | B2        | 26.1          | 2.81                       | 26.6         | 7.7                        | 21.3         | 3.6                        | 29.9             |                            |  |
|                                    |              |       | B3        | 28.4          | 3.78                       | 0.6          | 8.1                        | 17.2         | 4.3                        | 10.5             |                            |  |
|                                    |              |       | B4        | 26.9          | 2.73                       | 28.8         | 10.1                       | -7.7         | 5.2                        | -18.1            |                            |  |
|                                    |              |       | B5        | 25.0          | 3.12                       | 18.3         | 6.5                        | 36.8         | 4.5                        | 3.2              |                            |  |
|                                    |              |       | B6        | 24.5          | 3.64                       | 4.4          | 8.0                        | 18.0         | 4.6                        | -1.1             |                            |  |
