# Supplementary material
Source: PubMed Central journal article supplement (PMC2670144)
Supplement: M807241200_3.pdf [file M807241200_3.pdf]

# Ki determination and competitive behavior of Compound 1-14

Effects Compound 1-14 on Glepp1

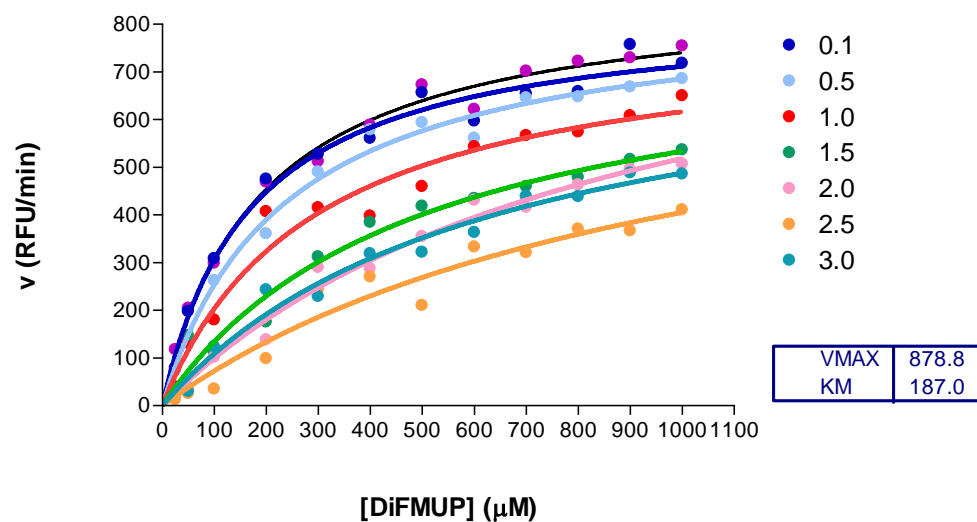

Lineweaver-Burk Plot

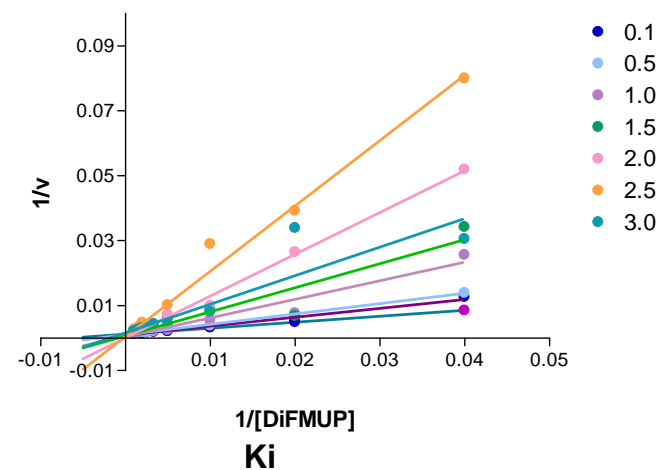

|      | 0     | 0.1   | 0.5   | 1     | 1.5   | 2     | 2.5   | 3     |
|------|-------|-------|-------|-------|-------|-------|-------|-------|
| VMAX | 878.8 | 834.2 | 845.4 | 796.2 | 796   | 975.5 | 823.9 | 794.4 |
| KM   | 187   | 172   | 233.3 | 291.3 | 492.3 | 882   | 1032  | 628.9 |

Conclusion: competitive inhibition

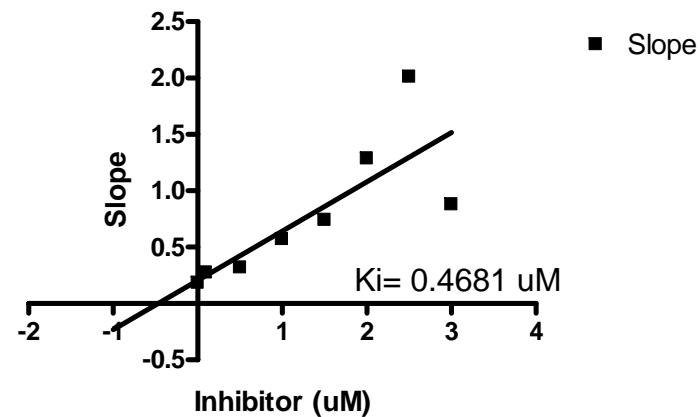

# Ki determination and competitive behavior of Compound 2-10

Effects of Compound 2-10 on Glepp1

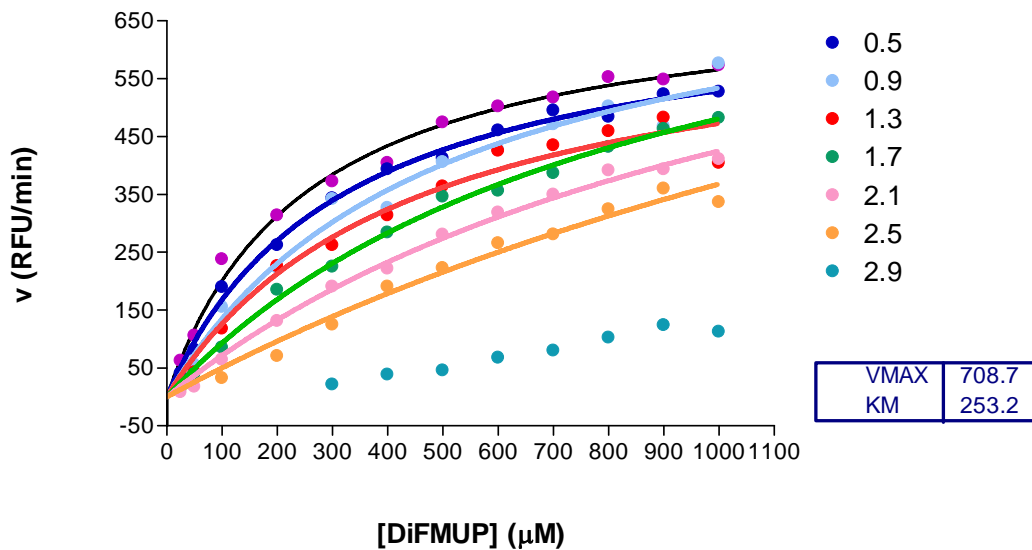

Lineweaver-Burk Plot

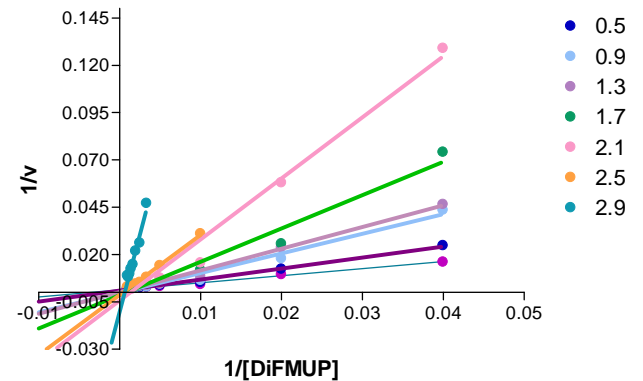

|      | 0     | 0.5   | 0.9   | 1.3   | 1.7   | 2.1   | 2.5  | 2.9 |
|------|-------|-------|-------|-------|-------|-------|------|-----|
| VMAX | 708.7 | 695.6 | 795.7 | 680.3 | 896.2 | 945.2 | 1252 | N/A |
| KM   | 253.2 | 314.6 | 490.2 | 439.2 | 864.8 | 1224  | 2403 | N/A |

Ki

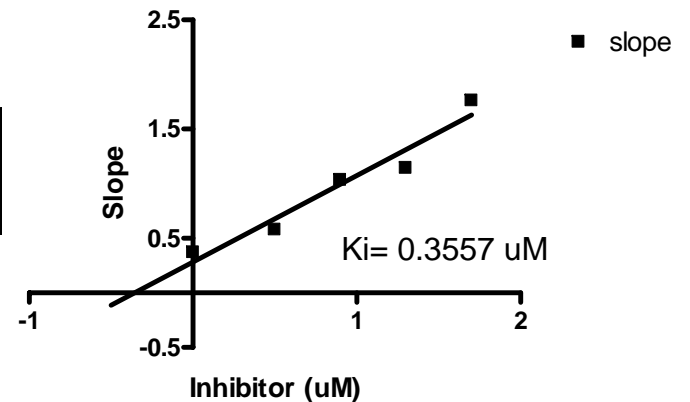

Conclusion: competitive inhibition
